# Supplementary material for: Thermoelectric Properties of n-Type Bi4O4SeX2 (X = Cl, Br)
Source: MDPI journal article supplement (doi:10.3390/ma16124329), 2023-06-12
Supplement: s1 [file s1]

Supplementary information for “Thermoelectric properties of  
*n*-type  $\text{Bi}_4\text{O}_4\text{SeX}_2$  ( $\text{X} = \text{Cl}, \text{Br}$ )”

Tao Wang,<sup>1,2,3</sup> Wanghua Hu,<sup>1,2,3</sup> Zhefeng Lou,<sup>2,3</sup> Zhuokai Xu,<sup>2,3</sup>

Xiaohui Yang,<sup>2,3,4</sup> Tian Le,<sup>2,3</sup> Jialu Wang,<sup>2,3</sup> and Xiao Lin<sup>2,3</sup>

<sup>1</sup>*Department of Physics, Fudan University, Shanghai 200433, China*

<sup>2</sup>*Key Laboratory for Quantum Materials of Zhejiang Province,*

*Department of Physics, School of Science,*

*Westlake University, Hangzhou 310030, China*

<sup>3</sup>*Institute of Natural Sciences, Westlake Institute*

*for Advanced Study, Hangzhou 310024, China*

<sup>4</sup>*Department of Physics, China Jiliang University,*

*Hangzhou 310018, Zhejiang, China*

## I. HALL RESISTIVITY

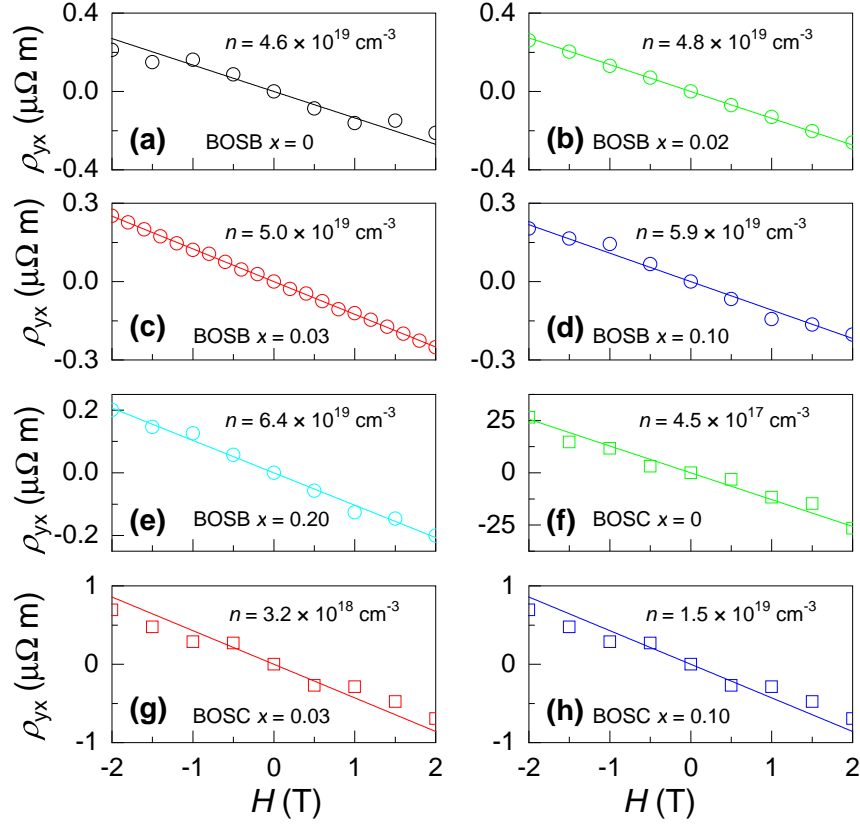

**Figure S1.** Hall resistivity at 300 K for BOSB and BOSB ( $x = 0, 0.02, 0.03, 0.10, 0.20$ ).

Fig. S1 presents the Hall resistivity ( $\rho_{yx}$ ) for all samples at room-temperature. The negative slope ( $\rho_{yx}/B$ ) demonstrates that electrons dominate the electrical transport. The carrier concentration ( $n$ ) is estimated by a single-band model  $n = \frac{1}{R_H e}$ , where  $R_H$  is the hall coefficient.

## II. XRD REFINEMENT PATTERNS

Fig. S2 shows the Rietveld refinement XRD patterns of ten samples, the refinement software is FullProf Suite, XRD peak shape is fitting by Pseudo-Voigt function, the refinement results ( $R_p$ ,  $R_{wp}$ ) have been achieved by least-squares technique and shown in each figure.

Table S1 and Table S2 show the BOSX crystalline information, due to same space group ( $I4/mmm$ ) and similar atomic occupancy as well lattice constants (See table 1 of main text), there is only a slight difference in the angle of the peak position for BOSB and BOSC.

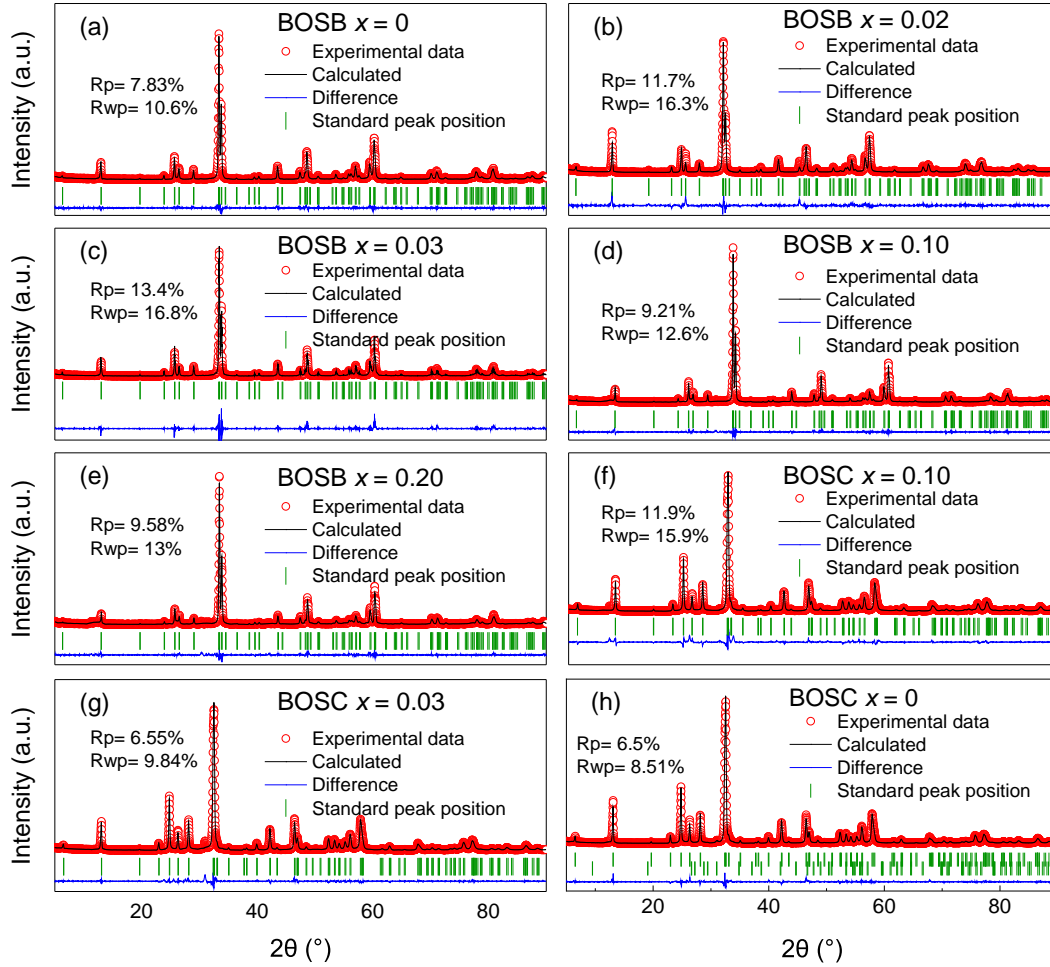

**Figure S2.** XRD refinement patterns of BOSX (X = Cl, Br;  $x = 0, 0.02, 0.03, 0.10, 0.20$ ).

**Table S1.** BOSB crystalline information

| Number | Element | Label | x       | y       | z       | Occ.    | U       | Site | Sym   |
|--------|---------|-------|---------|---------|---------|---------|---------|------|-------|
| 1      | Bi      | Bi1   | 1.00000 | 1.00000 | 0.56827 | 1.00000 | 0.00700 | 4e   | 4mm   |
| 2      | Bi      | Bi2   | 0.50000 | 0.50000 | 0.66148 | 1.00000 | 0.01300 | 4e   | 4mm   |
| 3      | Se      | Se1   | 0.50000 | 0.50000 | 0.50000 | 0.52000 | 0.00800 | 2a   | 4/mmm |
| 4      | Se      | Se2   | 1.00000 | 1.00000 | 0.70961 | 0.24200 | 0.00900 | 4e   | 4mm   |
| 5      | O       | O1    | 0.50000 | 1.00000 | 0.61190 | 1.00000 | 0.00800 | 8g   | 2mm   |
| 6      | Br      | Br1   | 0.50000 | 0.50000 | 0.50000 | 0.48000 | 0.00800 | 2a   | 4/mmm |
| 7      | Br      | Br2   | 1.00000 | 1.00000 | 0.70961 | 0.75800 | 0.00900 | 4e   | 4mm   |

Space group  $I4/mmm$ , BOSB lattice constants  $a = b = 3.93007 \text{ \AA}$

$c = 28.1763 \text{ \AA}$ ,  $V = 435.196 \text{ \AA}^3$ ,  $\rho_{\text{density}} = 8.6899 \text{ g/cm}^3$

**Table S2.** BOSC crystalline information

| Number | Element | Label | x       | y       | z       | Occ.    | U       | Site | Sym   |
|--------|---------|-------|---------|---------|---------|---------|---------|------|-------|
| 1      | Bi      | Bi1   | 1.00000 | 1.00000 | 0.56819 | 1.00000 | 0.007   | 4e   | 4mm   |
| 2      | Bi      | Bi2   | 0.50000 | 0.50000 | 0.65656 | 1.00000 | 0.01300 | 4e   | 4mm   |
| 3      | Se      | Se1   | 0.50000 | 0.50000 | 0.50000 | 0.59000 | 0.00800 | 2a   | 4/mmm |
| 4      | Se      | Se2   | 1.00000 | 1.00000 | 0.70662 | 0.21000 | 0.00900 | 4e   | 4mm   |
| 5      | O       | O1    | 0.50000 | 1.00000 | 0.60895 | 1.00000 | 0.00800 | 8g   | 2mm   |
| 6      | Cl      | Cl1   | 0.50000 | 0.50000 | 0.50000 | 0.41000 | 0.00800 | 2a   | 4/mmm |
| 7      | Cl      | Cl2   | 1.00000 | 1.00000 | 0.70662 | 0.79000 | 0.00900 | 4e   | 4mm   |

Space group  $I4/mmm$ , BOSC lattice constants  $a = b = 3.89373 \text{ \AA}$

$c = 27.02904 \text{ \AA}$ ,  $V = 410.84 \text{ \AA}^3$ ,  $\rho_{density} = 8.4862 \text{ g/cm}^3$

### III. CALCULATION OF EFFECTIVE MASS AND LORENZ NUMBER

In the context of the single parabolic band assumption, the effective mass ( $m^*$ ) and Lorenz number ( $L$ ) can be determined by the following expressions:

$$m^* = \frac{h^2}{2k_B T} \left[ \frac{n}{4\pi F_{1/2}(\eta)} \right]^{2/3} \quad (1)$$

$$S = \pm \frac{k_B}{e} \left[ \frac{(r + 5/2) F_{r+3/2}(\eta)}{(r + 3/2) F_{r+1/2}(\eta)} - \eta \right] \quad (2)$$

$$F_n(\eta) = \int_0^\infty \frac{\chi^n}{1 + \exp(\chi - \eta)} d\chi \quad (3)$$

$$L = \left( \frac{k_B}{e} \right)^2 \left\{ \frac{(r + 7/2) F_{5/2+r}(\eta)}{(r + 3/2) F_{1/2+r}(\eta)} - \left[ \frac{(r + 5/2) F_{3/2+r}(\eta)}{(r + 3/2) F_{1/2+r}(\eta)} \right]^2 \right\} \quad (4)$$

where  $\eta$  denotes the reduced Fermi level, which is calculated as the ratio of Fermi energy  $E_F$  to  $k_B T$  (the Boltzmann constant multiplied by the temperature in Kelvin). The remaining physical parameters used in the equations include  $h$  (the Planck constant),  $F_n$  (the  $n$ th order Fermi integral),  $\chi$  (reduced energy, defined as  $\chi = E/k_B T$ ) and  $e$  (the elementary charge). Additionally, the scattering exponent  $r = -1/2$ , where Acoustic Phonon Scattering (APS) is the dominant carrier scattering mechanisms in the samples.

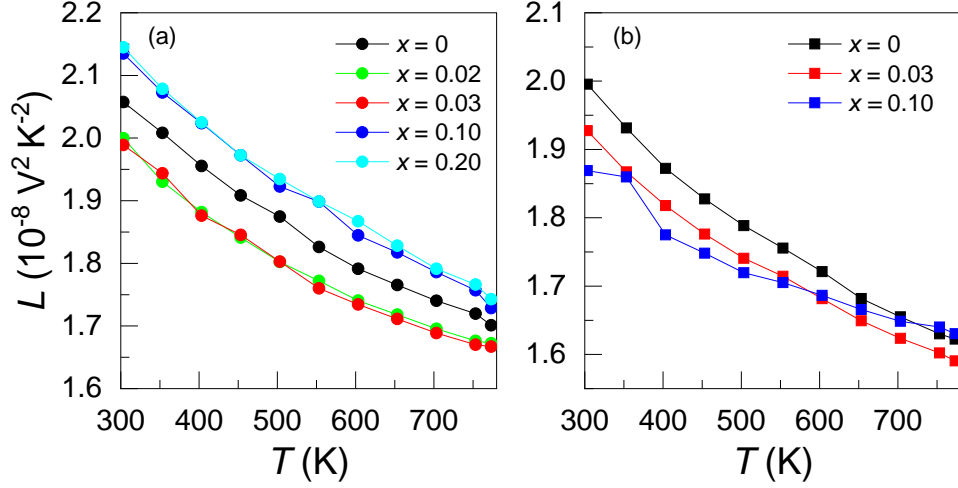

**Figure S3.** The temperature-dependent the Lorentz number for BOSC and BOSB ( $x = 0, 0.02, 0.03, 0.10, 0.20$ ).

#### IV. ELASTIC CONSTANTS

For BOSC with  $I4/mmm$  space group, there are six independent elastic constants  $C_{11}$ ,  $C_{12}$ ,  $C_{13}$ ,  $C_{33}$ ,  $C_{44}$  and  $C_{66}$  corresponding to 144.83, 71.69, 39.83, 63.72, 21.16 and 58.89 GPa. The elastic stability criteria for tetragonal crystal system are shown as follows<sup>1</sup>:

$$C_{11} > |C_{12}| \quad (5)$$

$$2 * C_{13}^2 < C_{33} * (C_{11} + C_{12}) \quad (6)$$

$$C_{44} > 0 \quad (7)$$

$$C_{66} > 0 \quad (8)$$

Average mechanical properties<sup>2</sup> of bulk BOSC polycrystal include bulk modulus ( $B$ ) 57.54 GPa, shear modulus ( $G$ ) 27.77 GPa, longitudinal velocity ( $v_l$ ), transverse sound velocity ( $v_t$ ) and average sound velocity ( $v_a$ )<sup>3</sup>, which can be calculated by formula (9)-(13).

$$B = (2C_{11} + C_{33} + 2C_{12} + 4C_{13}) / 9 \quad (9)$$

$$G = (2C_{11} + C_{33} - C_{12} - 2C_{13} + 6C_{44} + 3C_{66}) / 15 \quad (10)$$

$$v_l = \sqrt{\frac{(B + (4/3)G)}{\rho_{\text{density}}}} \quad (11)$$

$$v_t = \sqrt{\frac{G}{\rho_{\text{density}}}} \quad (12)$$

$$v_{\text{a}} = \left[ \frac{1}{3} \left( \frac{1}{v_{\text{l}}^3} + \frac{2}{v_{\text{t}}^3} \right) \right]^{-\frac{1}{3}} \quad (13)$$

## References

---

- [1] F. Mouhat and X. Coudert, François, Phys. Rev. B **90**, 224104 (2014).
- [2] L. Liu, D. Wang, Y. Zhong, and C. Hu, Appl. Sci. **9**, 1267 (2019).
- [3] Y. Duan, Y. Sun, M. Peng, and S. Zhou, J. Alloys Compd. **595**, 14 (2014).
